# Supplementary material for: Reversible data encryption–decryption using a pH stimuli-responsive hydrogel
Source: Royal Society of Chemistry journal article supplement (doi:10.1039/d0tc05578f), 2021-01-01
Supplement: d0tc05578f1.pdf [file d0tc05578f1.pdf]

## Supporting information

### Reversible Data Encryption-Decryption using pH Stimuli-Responsive Hydrogel

Hongjing Wen,<sup>ab</sup> Xianzhi Zeng,<sup>b</sup> Xiaoxuan Xu,<sup>a</sup> Wanyi Li,<sup>b</sup> Fei Xie,<sup>b</sup> Zhong Xiong,<sup>c</sup> Shichao Song,<sup>b</sup> Bin Wang,<sup>\*a</sup> Xiangping Li<sup>b</sup> and Yaoyu Cao<sup>\*b</sup>

<sup>a</sup> The Key Laboratory of Weak-Light Nonlinear Photonics, Ministry of Education, School of Physics, Nankai University, Tianjin 300071, China.

<sup>b</sup> Guangdong Provincial Key Laboratory of Optical Fiber Sensing and Communications, Institute of Photonics Technology, Jinan University, Guangzhou 511443, P. R. China.

<sup>c</sup> College of Chemistry and Chemical Engineering and Institute of Marine Biobased Materials, Shandong Collaborative Innovation Center of Marine Biobased Fibers and Ecological Textiles, State Key Laboratory of Bio-fibers and Ecotextiles, Qingdao University, Qingdao 266071, China.

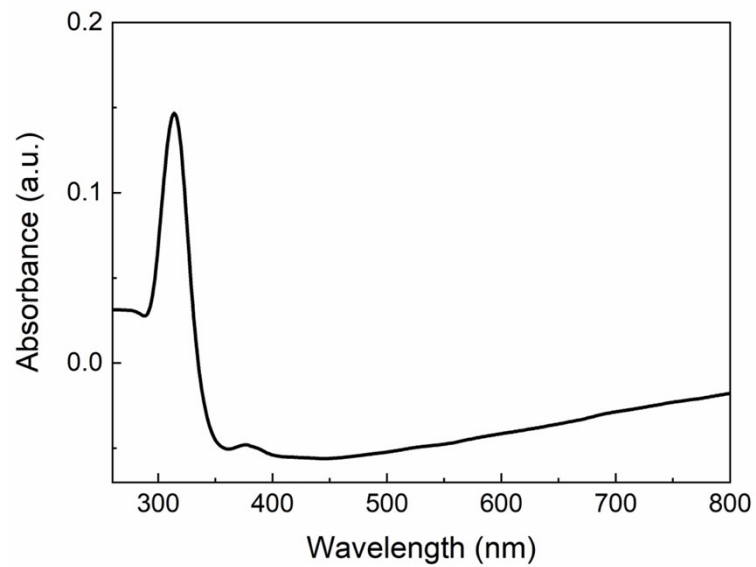

**Fig. S1. The Ultraviolet-visible (UV-vis) absorption spectrum of pH-responsive hydrogel. Maximum absorption occurs at the wavelength of 313 nm.**

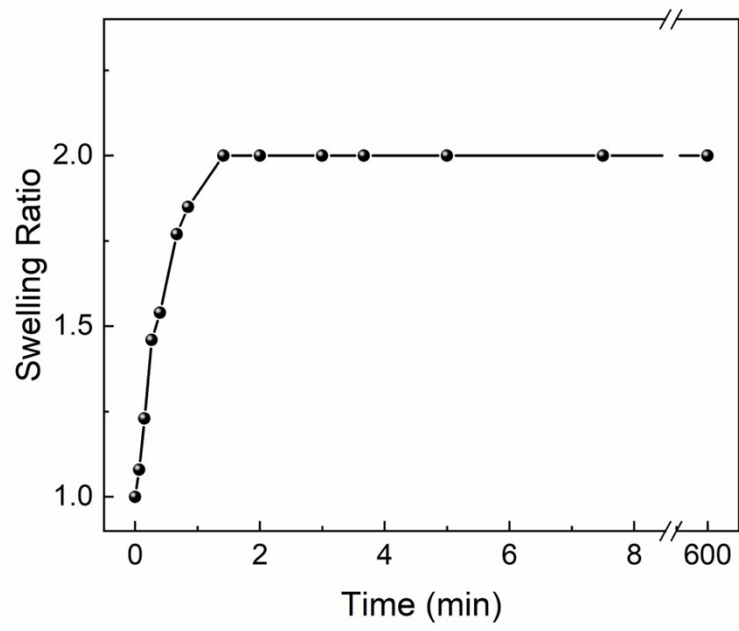

**Fig. S2. Swelling ratio of pH-responsive hydrogel in deionized water as a function of time.** The time-evolution swelling ratio reflected the water absorption ability of the pH-responsive hydrogel, swelling equilibrium is reached in less than two minutes.

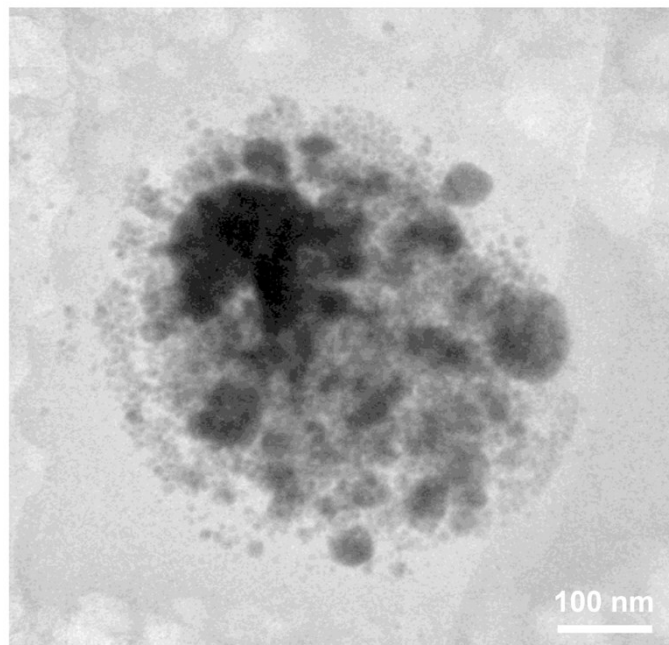

**Fig. S3. TEM image of a single silver dot in pH-responsive hydrogel.** The single silver dot is recorded at writing power of 0.3 mW and exposure time of 80 ms.

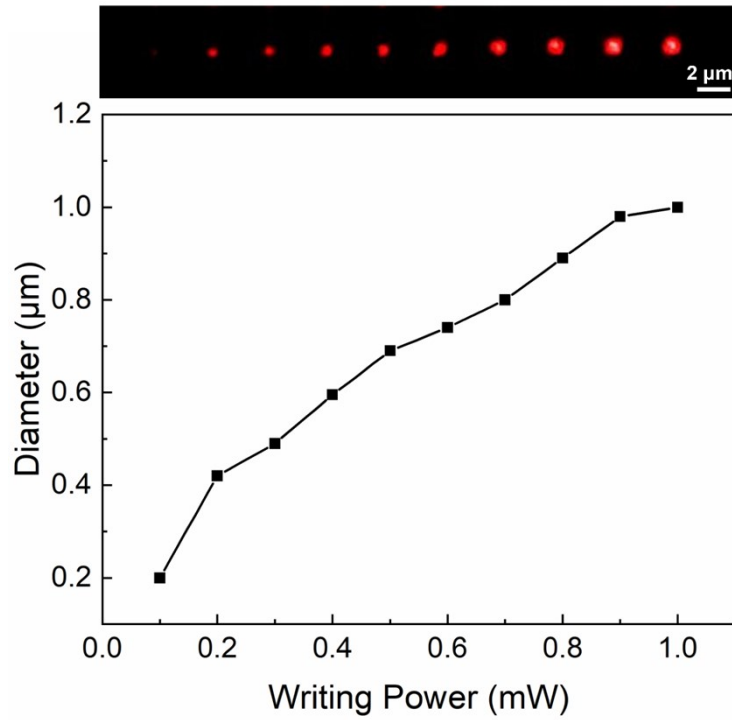

**Fig. S4. Size characteristics of silver dots array with different writing powers.** Dark-field image (upper) of silver dots array with different writing powers (from left to right: 0.1 mW, 0.2 mW, 0.3 mW, 0.4 mW, 0.5 mW, 0.6 mW, 0.7 mW, 0.8 mW, 0.9 mW, 1.0 mW) and the corresponding dot structure diameters (lower) with the increasing writing power.
